# Supplementary material
Source: publisher figshare collection journal article supplement (https://geolsoc.figshare.com/articles/dataset/_/3453374)

**Color-coded set of maps indicating exhumation history of the Eastern Cordillera.**

Caption: This set of figures takes Fig. 3, which shows the locations of analyzed samples described in chapter “Existing knowledge of exhumation history of the Eastern Cordillera”, and highlights those indicating active exhumation for respective time period.

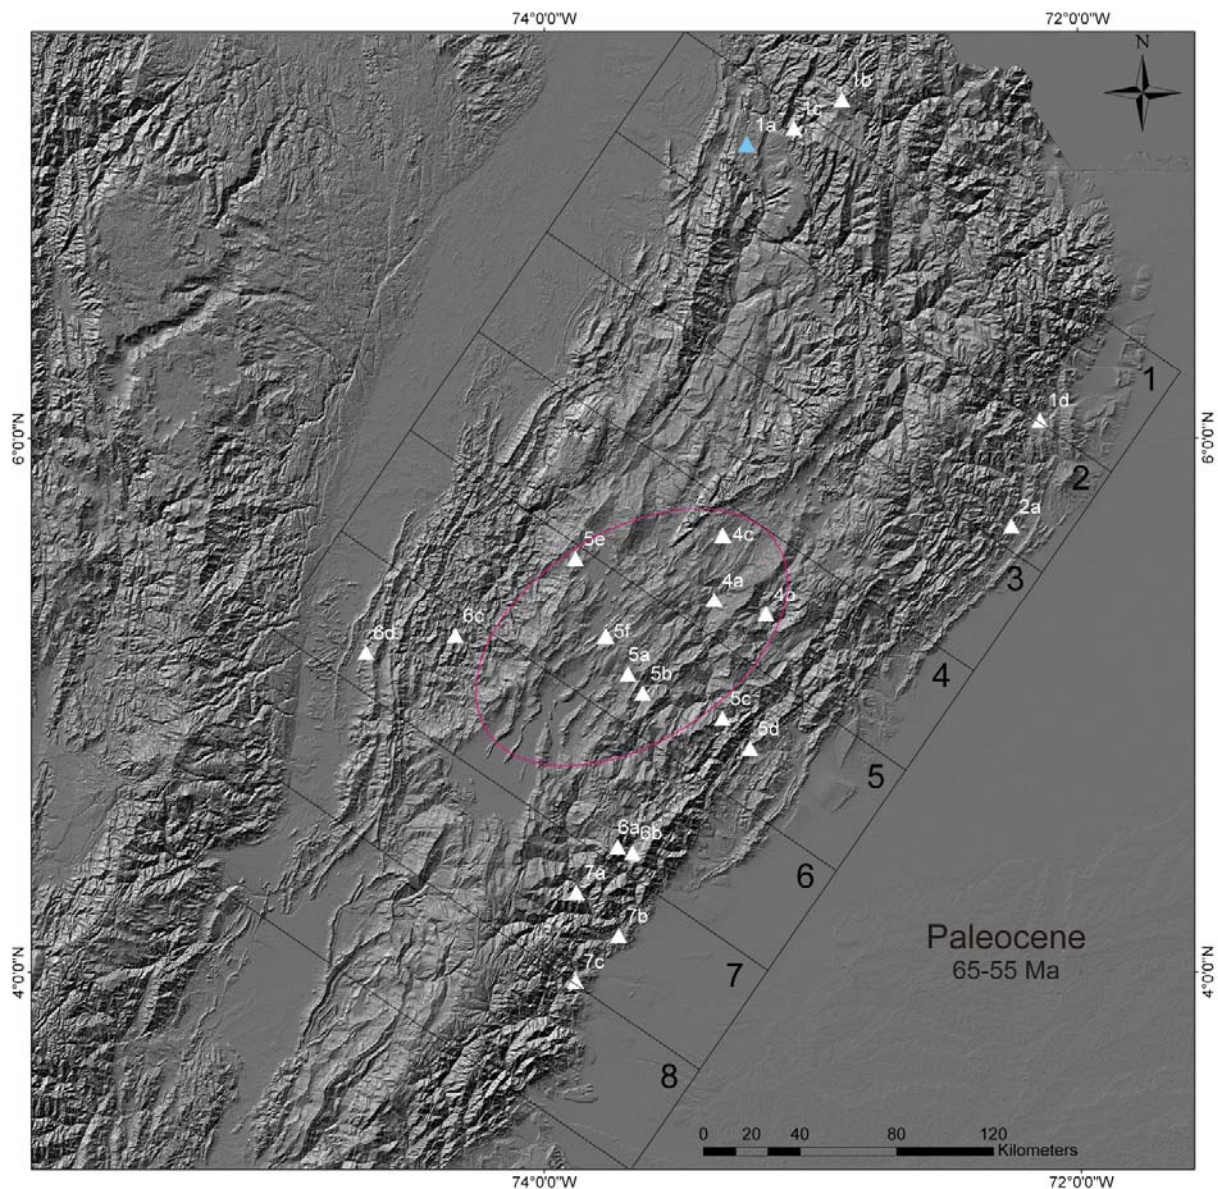

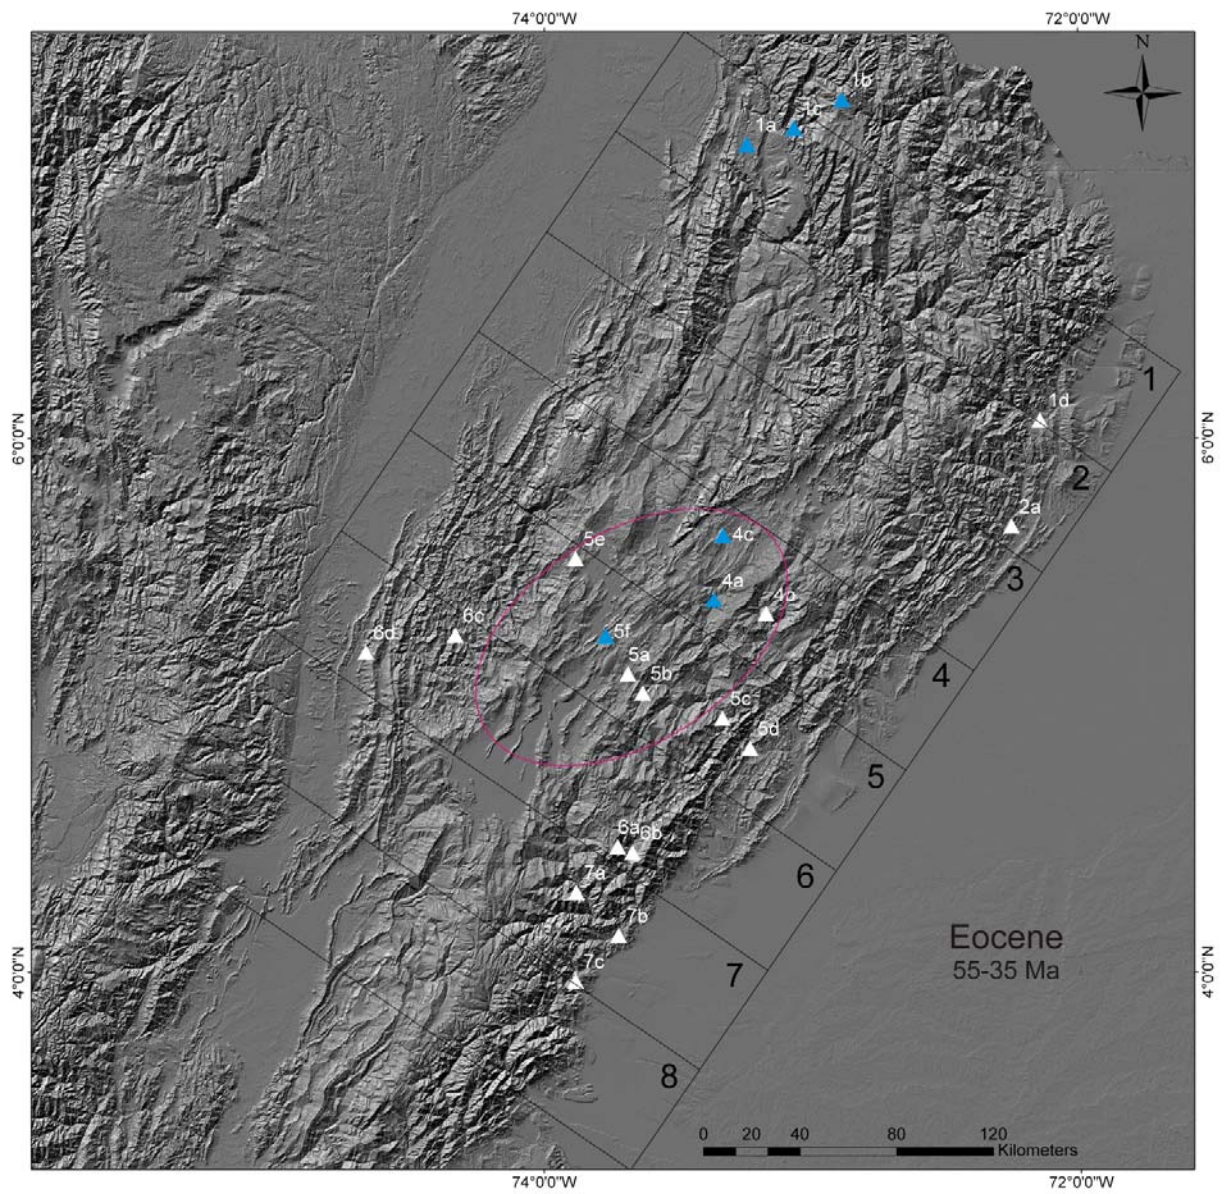

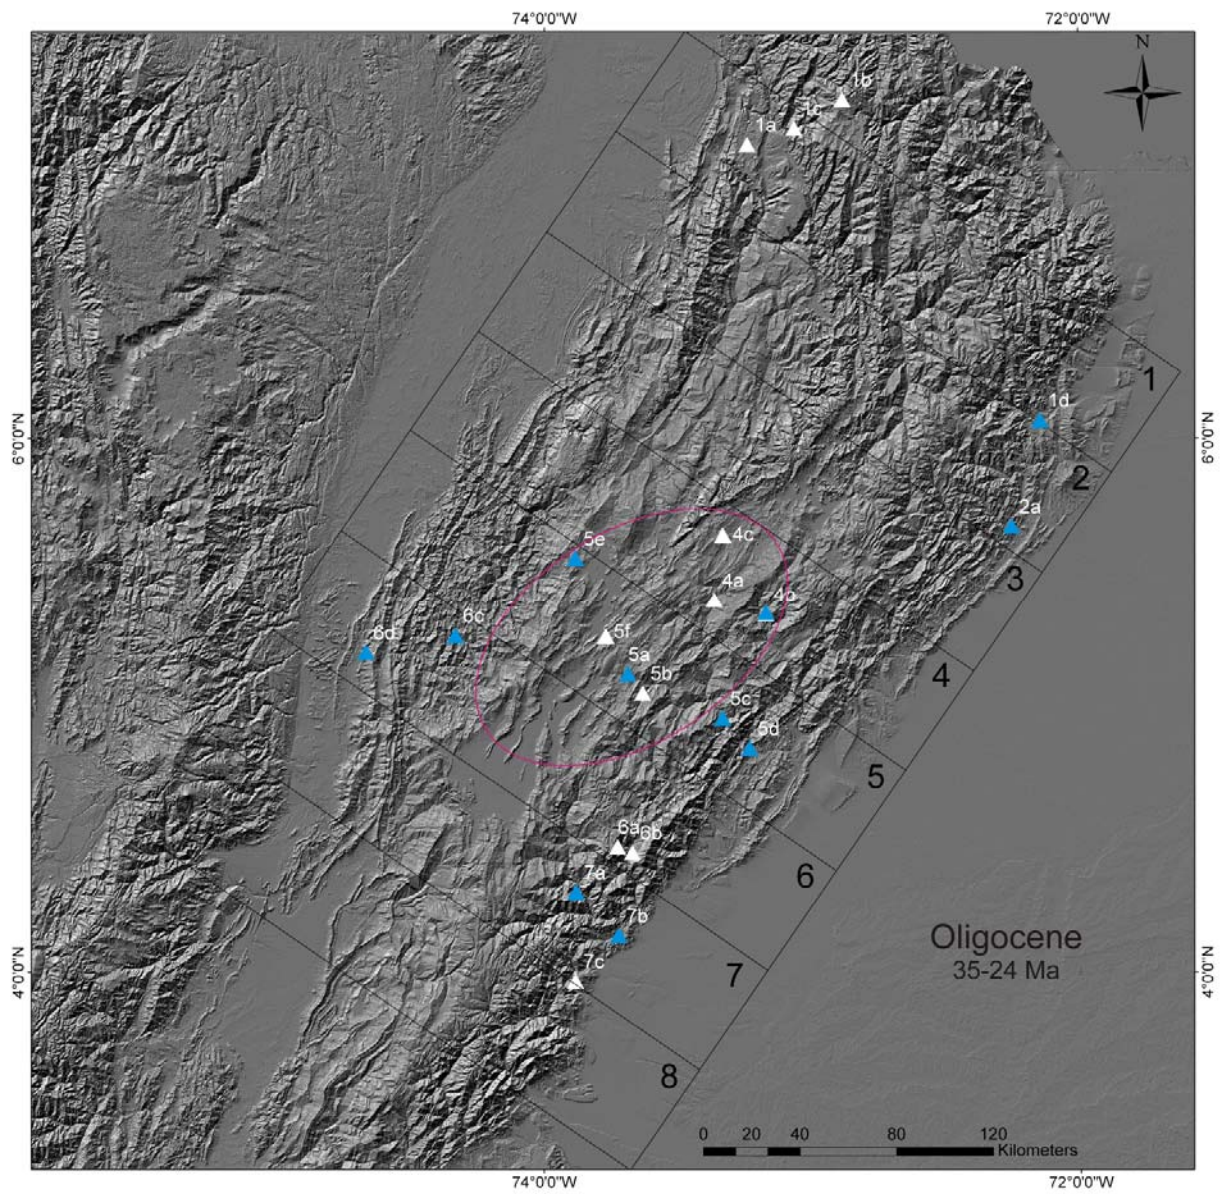

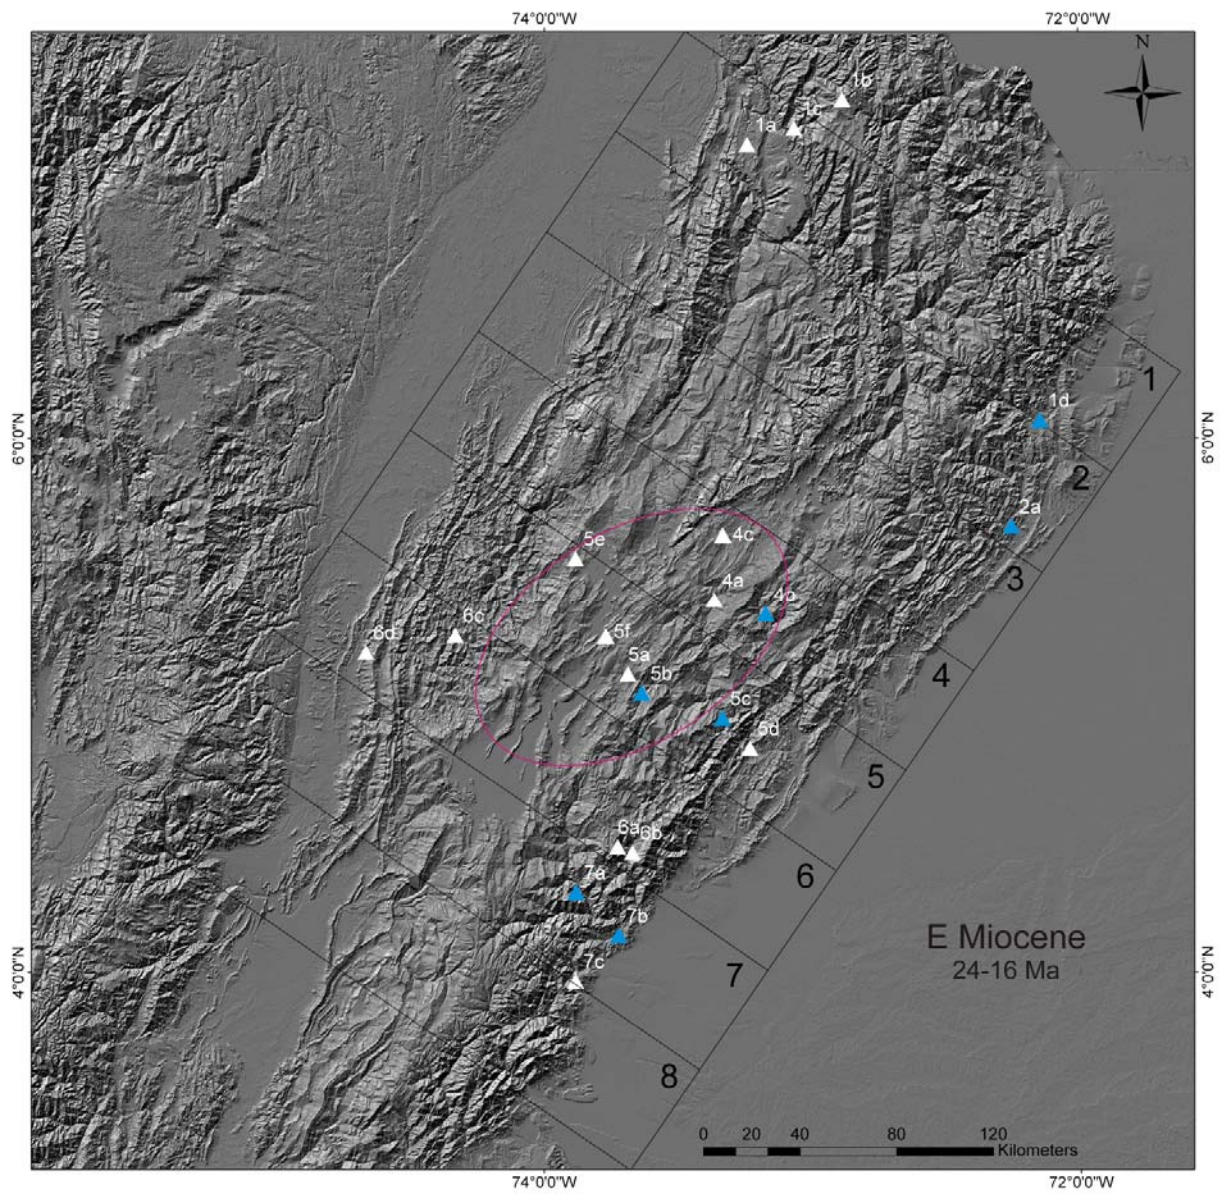

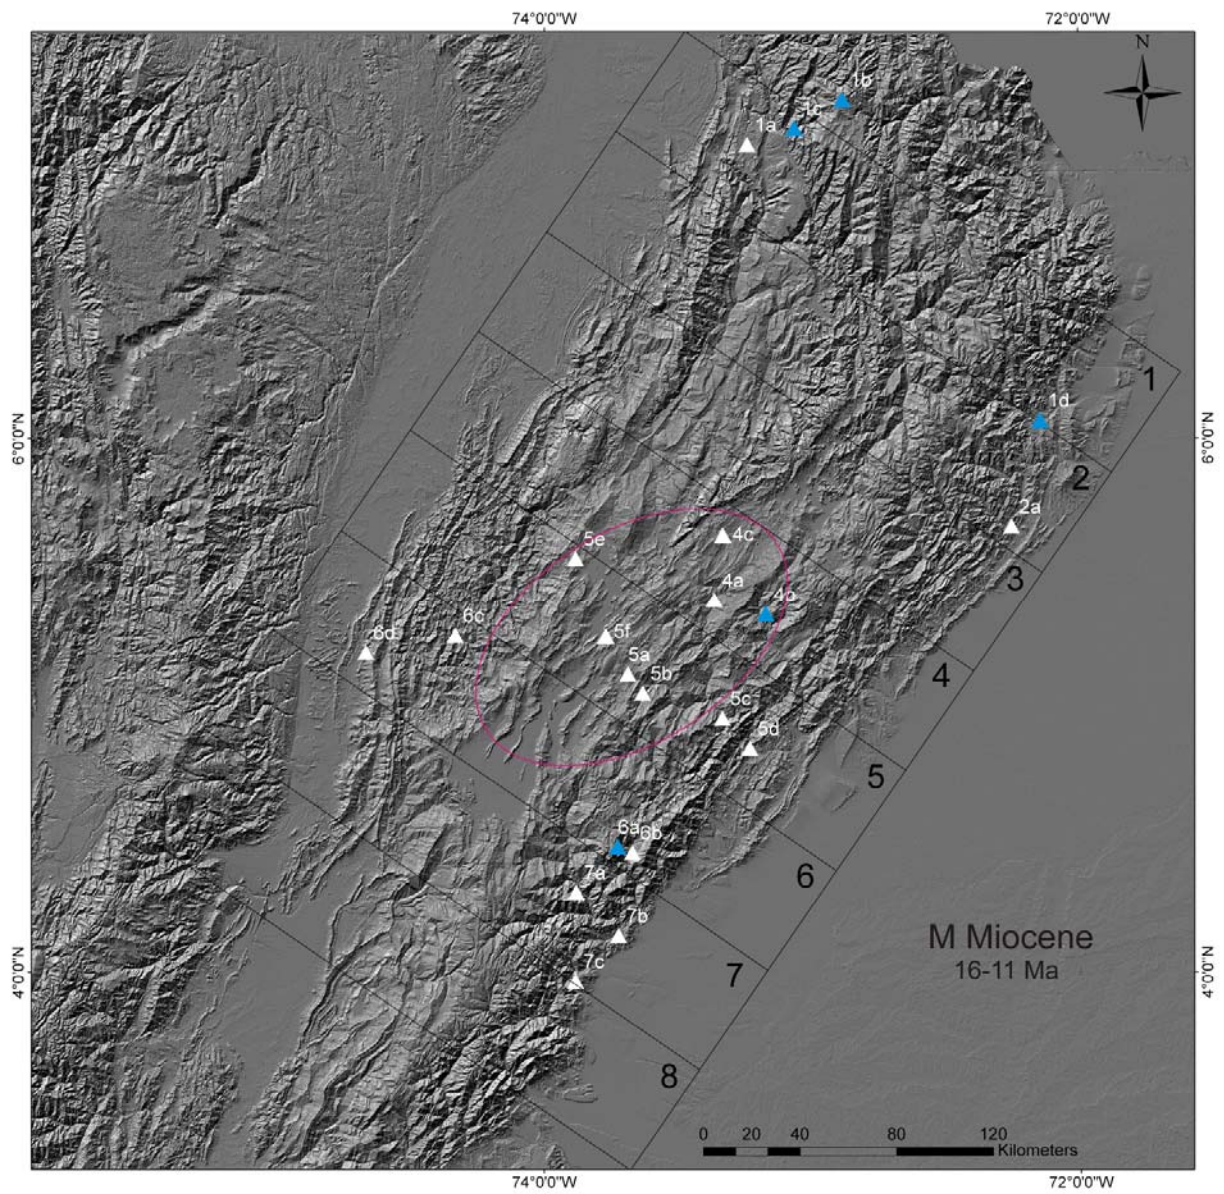

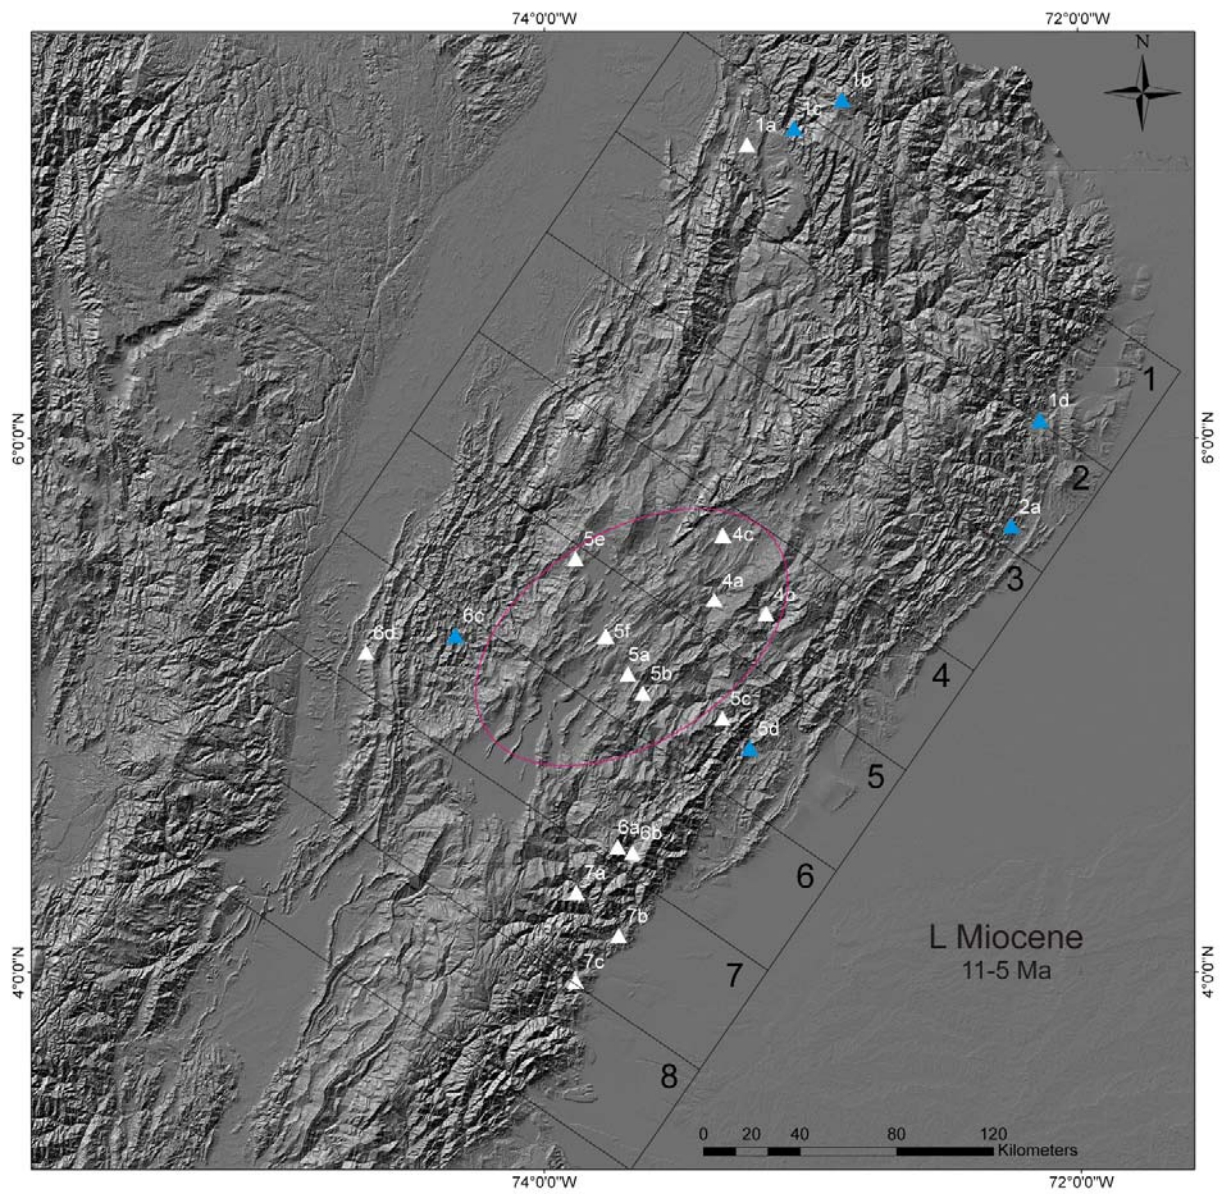

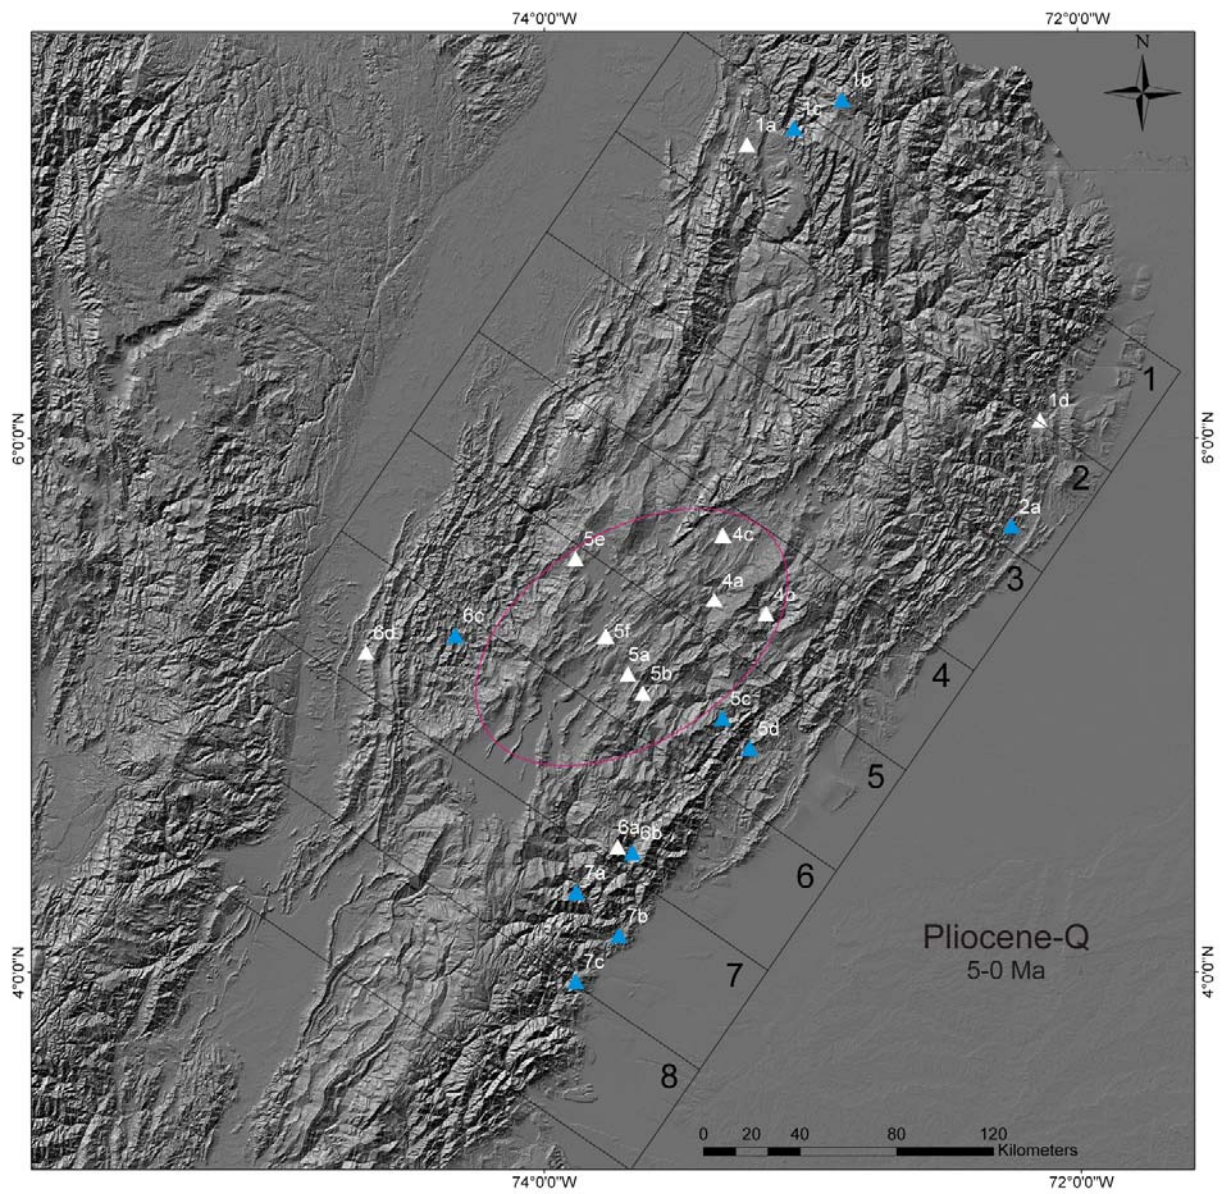

Supplement: Supplementary file 11 [file 1]
